# Supplementary material
Source: Springer Nature journal article supplement (https://www.springermedizin.de/resource/supplementary/12933_2009_212_MOESM1_ESM.pdf/9539862)
Supplement: MOESM1 [file 9539862]

|                                                    | E/Em < 8 | E/Em 8-14 | E/Em ≥ 15 | Overall P    |
|----------------------------------------------------|----------|-----------|-----------|--------------|
| n                                                  | 12(29%)  | 23 (56%)  | 6 (15%)   | -            |
| Sex (f) (%)                                        | 8%       | 35%       | 50%       | <b>0,01*</b> |
| Age (years, mean)                                  | 52       | 55        | 67        | <b>0,01*</b> |
| BMI (kg/m <sup>2</sup> )                           | 30       | 28        | 30        | 0,24         |
| Waist circumference (mean, cm)                     | 105      | 101       | 102       | 0,66         |
| Abdominal girth (mean, cm)                         | 107      | 101       | 100       | 0,34         |
| Fasting glucose (mg/dl)                            | 92       | 90        | 111       | 0,1          |
| HbA1c (%)                                          | 6,1%     | 6,2%      | 6,9%      | 0,31         |
| Smoking (%)                                        | 83%      | 78%       | 67%       | 0,72         |
| Treated Hypertension (%)                           | 92%      | 87%       | 100%      | 0,22         |
| CAD (% , stenosis > 50%)                           | 92%      | 78%       | 83%       | 0,66         |
| 1 vessel disease (% , stenosis > 50%) <sup>#</sup> | 33%      | 30%       | 50%       | 0,45         |
| 2 vessel disease (% , stenosis > 50%) <sup>#</sup> | 17%      | 17%       | 0%        | 0,45         |
| 3 vessel disease (% , stenosis> 50%) <sup>#</sup>  | 41%      | 17%       | 17%       | 0,45         |
| Previous MI (%)                                    | 58%      | 43%       | 16%       | 0,24         |
| Previous Angioplasty (%)                           | 67%      | 38%       | 67%       | 0,21         |
| Aortocoronary bypass (%)                           | 0%       | 5%        | 17%       | 0,27         |
| CAN (Score ≥ 3) (%)                                | 9%       | 17%       | 60%       | 0,05         |
| EF (mean, %)                                       | 64%      | 65%       | 62%       | 0,9          |
| EF < 55% (%)                                       | 25%      | 17%       | 17%       | 0,84         |
| Diabetes (% , known or new detected)               | 33%      | 26%       | 83%       | <b>0,03*</b> |
